# Supplementary material
Source: PubMed Central journal article supplement (PMC4336529)
Supplement: jn.114.202531_nutrition202531SupplementaryData1.pdf [file jn.114.202531_nutrition202531SupplementaryData1.pdf]

## Online Supporting Material

**Supplemental Table 1.** Formulation of fructose/glucose and sucrose diets<sup>1</sup>.

| <b>Fructose/glucose diet (TD.05668) 25% kcal from glucose + fructose</b> |              |                    |                     |                          |                 |
|--------------------------------------------------------------------------|--------------|--------------------|---------------------|--------------------------|-----------------|
| <b>Ingredient</b>                                                        | <b>g/kg</b>  | <b>% Weight</b>    | <b>Protein g/kg</b> | <b>Carbohydrate g/kg</b> | <b>Fat g/kg</b> |
| Wheat, Hard Ground                                                       | 335.0        | 33.5               | 46.6                | 178.9                    | 6.0             |
| <i>Dextrose</i> , Monohydrate (Cerelese)                                 | 111.0        | 11.1               | 0.0                 | 101.2                    | 0.0             |
| <i>Fructose</i>                                                          | 101.0        | 10.1               | 0.0                 | 101.0                    | 0.0             |
| Corn, Ground                                                             | 95.0         | 9.5                | 7.7                 | 65.7                     | 3.0             |
| Corn Gluten Meal 60                                                      | 50.0         | 5.0                | 30.4                | 12.7                     | 1.1             |
| Soybean Meal, 48%                                                        | 200.0        | 20.0               | 96.6                | 51.0                     | 1.8             |
| Dicalcium Phosphate, FG                                                  | 16.0         | 1.6                | 0.0                 | 0.0                      | 0.0             |
| Calcium Carbonate, FG                                                    | 13.0         | 1.3                | 0.0                 | 0.0                      | 0.0             |
| Sodium Chloride NaCl                                                     | 5.0          | 0.5                | 0.0                 | 0.0                      | 0.0             |
| Mineral Mix, TD.80318                                                    | 1.5          | 0.2                | 0.1                 | 0.7                      | 0.03            |
| Vitamin Mix, TD.81125                                                    | 3.0          | 0.3                | 0.1                 | 0.8                      | 0.04            |
| TBHQ (Antioxidant)                                                       | 0.01         | 0.001              | 0.0                 | 0.0                      | 0.0             |
| Corn Oil                                                                 | 40.0         | 4.0                | 0.0                 | 0.0                      | 40.0            |
| Cellulose (Fiber)                                                        | 29.5         | 3.0                | 0.0                 | 0.0                      | 0.0             |
| Totals (g/kg)                                                            | 1000         | 100                | 181.38              | 512.02                   | 52.04           |
| <b>Summary Data</b>                                                      | <b>Total</b> | <b>Crude Fiber</b> | <b>Protein</b>      | <b>Carbohydrate</b>      | <b>Fat</b>      |
| Diet %                                                                   | 100          | 5.4                | 18.1                | 51.2                     | 5.2             |
| kcal/kg                                                                  | 3242.0       | 0.0                | 725.5               | 2048.1                   | 468.4           |
| kcal %                                                                   | 100          | 0.0                | 22.4                | 63.2                     | 14.5            |
| <b>Sucrose diet (TD.05667) 25% kcal from sucrose</b>                     |              |                    |                     |                          |                 |
| <b>Ingredient</b>                                                        | <b>g/kg</b>  | <b>% weight</b>    | <b>Protein g/kg</b> | <b>Carbohydrate g/kg</b> | <b>Fat g/kg</b> |
| Wheat, Hard Ground                                                       | 335.0        | 33.5               | 46.6                | 178.9                    | 6.0             |
| <i>Sucrose</i>                                                           | 205.0        | 20.5               | 0.0                 | 205.0                    | 0.0             |
| Corn, Ground                                                             | 95.0         | 9.5                | 7.7                 | 65.7                     | 3.0             |
| Corn Gluten Meal 60                                                      | 50.0         | 5.0                | 30.4                | 12.7                     | 1.1             |
| Soybean Meal, 48%                                                        | 200.0        | 20.0               | 96.6                | 51.0                     | 1.8             |
| Dicalcium Phosphate, FG                                                  | 16.0         | 1.6                | 0.0                 | 0.0                      | 0.0             |
| Calcium Carbonate, FG                                                    | 13.0         | 1.3                | 0.0                 | 0.0                      | 0.0             |
| Sodium Chloride NaCl                                                     | 5.0          | 0.5                | 0.0                 | 0.0                      | 0.0             |
| Mineral Mix, TD.80318                                                    | 1.5          | 0.2                | 0.1                 | 0.7                      | 0.03            |
| Vitamin Mix, TD.81125                                                    | 3.0          | 0.3                | 0.1                 | 0.8                      | 0.04            |
| TBHQ (Antioxidant)                                                       | 0.01         | 0.001              | 0.0                 | 0.0                      | 0.0             |
| Corn Oil                                                                 | 40.0         | 4.0                | 0.0                 | 0.0                      | 40.0            |
| Cellulose (Fiber)                                                        | 36.5         | 3.6                | 0.0                 | 0.0                      | 0.0             |
| Totals (g/kg)                                                            | 1000         | 100                | 181.38              | 514.84                   | 52.04           |
| <b>Summary Data</b>                                                      | <b>Total</b> | <b>Crude Fiber</b> | <b>Protein</b>      | <b>Carbohydrate</b>      | <b>Fat</b>      |
| Diet %                                                                   | 100          | 5.1                | 18.1                | 51.5                     | 5.20            |
| kcal/kg                                                                  | 3253.3       | 0.0                | 725.5               | 2059.4                   | 468.4           |
| kcal %                                                                   | 100          | 0.0                | 22.3                | 63.3                     | 14.4            |

<sup>1</sup> Compositions of the mineral and vitamin mixes used in these diets are found in Supplemental Table 2.

## Online Supporting Material

**Supplemental Table 2.** Composition of mineral and vitamin mixes used in experimental diets<sup>1</sup>.

| <b>Mineral Mix (TD.80318)</b>              |             |
|--------------------------------------------|-------------|
| <b>Ingredient</b>                          | <b>g/kg</b> |
| Cobalt Carbonate, FG (46%)                 | 0.6         |
| Copper Sulfate, FG (25%)                   | 13.4        |
| Ferrous Sulfate, heptahydrate, FG (20%)    | 133.3       |
| Magnesium Oxide, FG (58%)                  | 55.3        |
| Manganous Oxide, FG (60%)                  | 111.2       |
| Potassium Iodate                           | 1.7         |
| Zinc Oxide, FG (72%)                       | 20.4        |
| Corn                                       | 664.1       |
| Total                                      | 1000        |
| <b>Vitamin Mix (TD.81125)</b>              |             |
| <b>Ingredient</b>                          | <b>g/kg</b> |
| Biotin, FG (1%)                            | 5.0         |
| Calcium Pantothenate, FG (73 g/kg)         | 24.8        |
| Choline Chloride, FG (60%)                 | 416.5       |
| Folic Acid                                 | 1.2         |
| Niacin, FG (99.5%)                         | 17.1        |
| Pyridoxine HCl                             | 1.5         |
| Riboflavin, FG (45 g/kg)                   | 7.9         |
| Thiamin Mononitrate                        | 5.2         |
| Vitamin A Acetate, FG (650 IU/mg)          | 3.7         |
| Vitamin B12, FG (136 mg/kg)                | 10.1        |
| Vitamin D3, cholecalciferol, FG (400 U/mg) | 4.2         |
| Vitamin E Acetate, FG (57 U/g)             | 60.5        |
| Vitamin K, MSB complex, FG (29 g/kg)       | 64.5        |
| Corn                                       | 377.9       |

## Online Supporting Material

**Supplemental Table 3.** Summary of mixed model results for weight and food intake of fructose/glucose and sucrose-fed mice within metabolic cages<sup>1</sup>

| <b>Weight</b>          |                 | LMM (Intercept at day 6; groups ( <i>n</i> ) = 9; observations = 136) |                |                    |
|------------------------|-----------------|-----------------------------------------------------------------------|----------------|--------------------|
| <i>Random effects</i>  | <i>Variance</i> | <i>Std. Deviation</i>                                                 |                |                    |
| Individual (Intercept) | 2.64            | 1.62                                                                  |                |                    |
| Individual (Slope)     | 0.001           | 0.030                                                                 |                |                    |
| <i>Fixed effects</i>   | <i>Estimate</i> | <i>Std. Error</i>                                                     | <i>Z value</i> | <i>Pr(&gt; z )</i> |
| Intercept              | 10.5            | 0.91                                                                  | 11.58          | <0.0001***         |
| Diet (Sucrose)         | 1.57            | 1.12                                                                  | 1.40           | 0.20               |
| Time (Days)            | 0.094           | 0.016                                                                 | 5.77           | 0.0007***          |
| Food Intake (g/day)    | 0.396           | 0.106                                                                 | 3.74           | 0.0003***          |
| Diet (Sucrose) x Time  | 0.012           | 0.022                                                                 | 0.55           | 0.60               |
| <b>Food Intake</b>     |                 | LMM (Intercept at day 6; groups ( <i>n</i> ) = 9; observations = 136) |                |                    |
| <i>Random effects</i>  | <i>Variance</i> | <i>Std. Deviation</i>                                                 |                |                    |
| Individual (Intercept) | 0.030           | 0.172                                                                 |                |                    |
| <i>Fixed effects</i>   | <i>Estimate</i> | <i>Std. Error</i>                                                     | <i>t value</i> | <i>Pr(&gt; t )</i> |
| Intercept              | 2.01            | 0.46                                                                  | 4.33           | 0.0022**           |
| Diet (Sucrose)         | -0.10           | 0.21                                                                  | -0.49          | 0.63               |
| Time (Days)            | 0.001           | 0.006                                                                 | -0.23          | 0.82               |
| Weight                 | 0.107           | 0.036                                                                 | 2.98           | 0.0163*            |
| Diet (Sucrose) x Time  | -0.001          | 0.007                                                                 | -0.12          | 0.90               |

<sup>1</sup> \* Indicates a p value < 0.05., \*\* <0.01, \*\*\*, <0.001. LMM, linear mixed-effects model

## Online Supporting Material

**Supplemental Table 4.** Summary of mixed model results concerning competitive ability, reproduction and body weight within OPAs for mice on the fructose/glucose and sucrose pre-competition diets <sup>1</sup>

| <b>Male Competitive Ability</b>     |                 | GLMM with binomial distribution and logit link<br>(Intercept at week 0; groups (n) = 6; observations = 112)     |                |                    |  |
|-------------------------------------|-----------------|-----------------------------------------------------------------------------------------------------------------|----------------|--------------------|--|
| <i>Random effects</i>               | <i>Variance</i> | <i>Std. Deviation</i>                                                                                           |                |                    |  |
| Population (Intercept)              | 0.0518          | 0.2276                                                                                                          |                |                    |  |
| <i>Fixed effects</i>                | <i>Estimate</i> | <i>Std. Error</i>                                                                                               | <i>Z value</i> | <i>Pr(&gt; z )</i> |  |
| Intercept                           | -0.422          | 0.228                                                                                                           | -1.85          | 0.06               |  |
| Initial Diet (Sucrose)              | -0.284          | 0.292                                                                                                           | -0.97          | 0.33               |  |
| Time (Weeks)                        | -0.018          | 0.014                                                                                                           | -1.33          | 0.18               |  |
| Initial Diet (Sucrose) x Time       | 0.006           | 0.019                                                                                                           | 0.32           | 0.75               |  |
| <b>Female Reproduction</b>          |                 | GLMM with Poisson distribution and logarithmic link<br>(Intercept at week 8; groups (n) = 6; observations = 60) |                |                    |  |
| <i>Random effects</i>               | <i>Variance</i> | <i>Std. Deviation</i>                                                                                           |                |                    |  |
| Population (Intercept)              | 0.066           | 0.256                                                                                                           |                |                    |  |
| Population (Slope)                  | 0.001           | 0.023                                                                                                           |                |                    |  |
| <i>Fixed effects</i>                | <i>Estimate</i> | <i>Std. Error</i>                                                                                               | <i>Z value</i> | <i>Pr(&gt; z )</i> |  |
| Intercept                           | 2.84            | 0.13                                                                                                            | 22.01          | <0.0001***         |  |
| Initial Diet (Sucrose)              | 0.339           | 0.098                                                                                                           | 3.48           | 0.0005***          |  |
| Time (Weeks)                        | 0.002           | 0.011                                                                                                           | 0.22           | 0.83               |  |
| Initial Diet (Sucrose) x Time       | -0.003          | 0.006                                                                                                           | -0.40          | 0.69               |  |
| <b>Male Reproduction</b>            |                 | GLMM with Poisson distribution and logarithmic link<br>(Intercept at week 8; groups (n) = 6; observations = 60) |                |                    |  |
| <i>Random effects</i>               | <i>Variance</i> | <i>Std. Deviation</i>                                                                                           |                |                    |  |
| Population (Intercept)              | 0.168           | 0.410                                                                                                           |                |                    |  |
| Population (Slope)                  | 0.000           | 0.015                                                                                                           |                |                    |  |
| <i>Fixed effects</i>                | <i>Estimate</i> | <i>Std. Error</i>                                                                                               | <i>Z value</i> | <i>Pr(&gt; z )</i> |  |
| Intercept                           | 2.28            | 0.19                                                                                                            | 11.80          | <0.0001***         |  |
| Initial Diet (Sucrose)              | 0.332           | 0.129                                                                                                           | 2.57           | †                  |  |
| Time (Weeks)                        | 0.013           | 0.009                                                                                                           | 1.50           | †                  |  |
| Initial Diet (Sucrose) x Time       | -0.057          | 0.009                                                                                                           | -5.99          | <0.0001***         |  |
| <b>Weight</b>                       |                 | LMM (Intercept at week 0) (Intercept at week 0; groups (n) = 160; observations = 706)                           |                |                    |  |
| <i>Random effects</i>               | <i>Variance</i> | <i>Std. Deviation</i>                                                                                           |                |                    |  |
| Individual (Intercept)              | 9.102           | 3.017                                                                                                           |                |                    |  |
| Individual (Slope)                  | 0.001           | 0.034                                                                                                           |                |                    |  |
| Population (Intercept)              | 0.140           | 0.375                                                                                                           |                |                    |  |
| <i>Fixed effects</i>                | <i>Estimate</i> | <i>Std. Error</i>                                                                                               | <i>t value</i> | <i>Pr(&gt; t )</i> |  |
| Intercept                           | 22.0            | 0.53                                                                                                            | 40.96          | <0.0001***         |  |
| Initial Diet (Sucrose)              | -1.05           | 0.71                                                                                                            | -1.47          | 0.14               |  |
| Sex (Male)                          | 1.93            | 0.84                                                                                                            | 2.30           | †                  |  |
| Time (Weeks)                        | 0.216           | 0.022                                                                                                           | 9.78           | †                  |  |
| Initial Diet (Sucrose) x Sex (Male) | 0.55            | 1.13                                                                                                            | 0.48           | 0.63               |  |
| Diet (Sucrose) x Time               | 0.014           | 0.021                                                                                                           | 0.67           | 0.51               |  |
| Sex Initial (Male) x Time           | -0.208          | 0.023                                                                                                           | -8.90          | <0.0001***         |  |

<sup>1</sup> \*\*\* Indicates a p value < 0.001. † Indicates a p-value that is not provided, as its corresponding fixed effect is involved in a significant interaction. GLMM, generalized linear mixed model. LMM, linear mixed-effects model

## Online Supporting Material

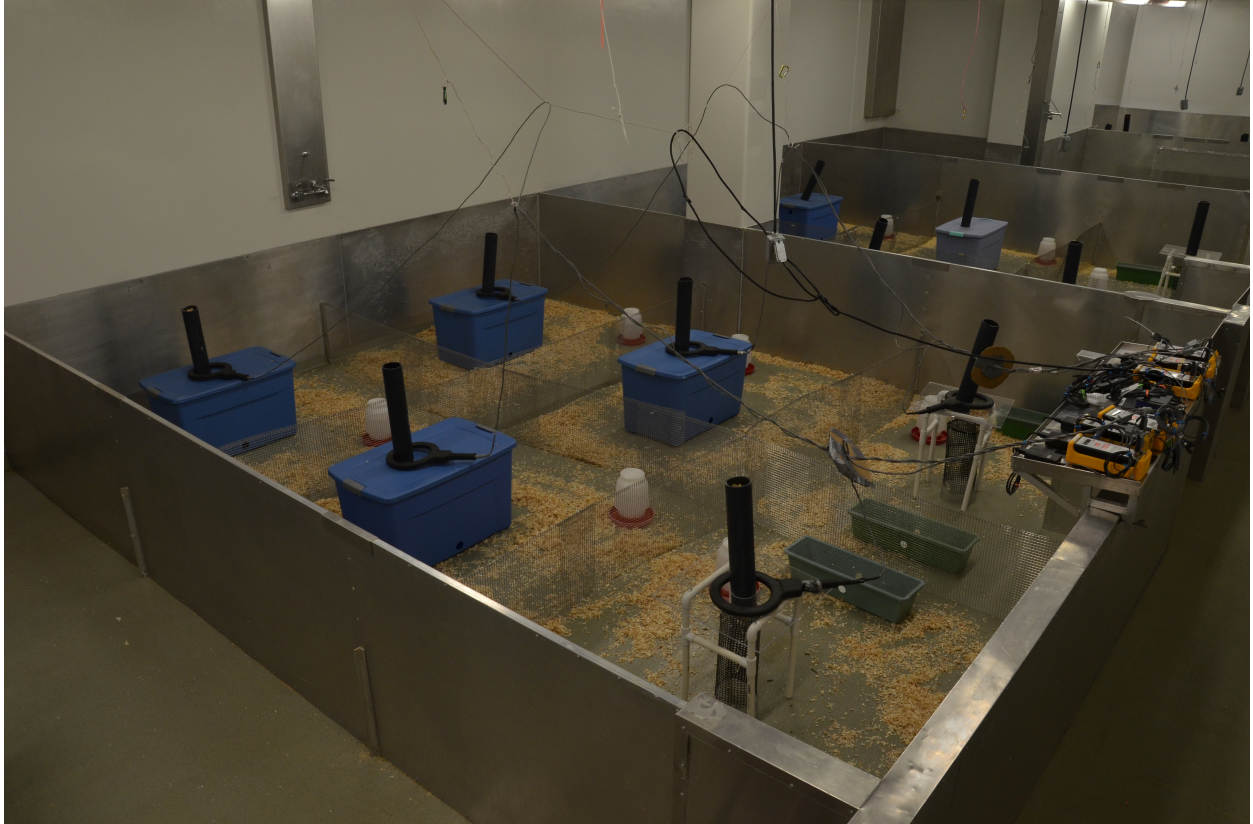

**Supplemental Figure 1. OPA enclosure photograph.** Enclosures are  $\sim 30\text{m}^2$  and are subdivided into six sections by wire mesh. Each section has a food source (black tubes) and water (white and red vessels) in conjunction with nesting sites in either one of four “optimal” territories with housing in enclosed structures (blue bins) or two “suboptimal” territories with housing open to light (green boxes with wire lids). PIT tag readers on the exterior rim of the enclosure connect to antennae (black rackets), over each food source. Photograph courtesy Douglas Cornwall. OPA, organismal performance assay.
